# Supplementary material
Source: PubMed Central journal article supplement (PMC3834079)

**Subgroups**

**Odds ratio and 95% CI**

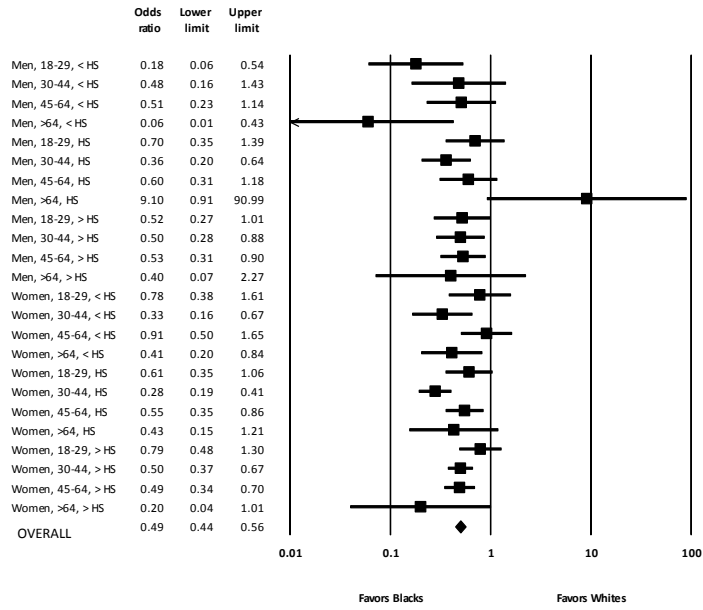

Supplement: NIHMS488401-supplement-2.pdf [file NIHMS488401-supplement-2.pdf]
